# Supplementary material for: Association between Muscle Quality Index and Long-Term Depression Risk in Women with Breastfeeding History: A NHANES-Based Cross- Sectional Study
Source: Research Square preprint supplement (doi:10.21203/rs.3.rs-6213174/v1), 2025-03-18
Supplement: Supplementary file 1 [file a18cb9e0a4656a87fe10ba26.docx]

Table S1 非母乳喂养的基线信息比较

**Table S2 Univariate logistic analysis of clinical characteristics between depression and non-depression in women with bf history**

| **Character** | **Estimate** | **Std. Error** | **t value** | ***P*r(>|t|)** | **95% CI** |
| --- | --- | --- | --- | --- | --- |
| **Age (years)** | 0 | 0.02 | 0 | 1.00 | 1.00(0.96,1.04) |
| **BMI (kg/m2)** | 0.06 | 0.02 | 2.36 | 0.03 | 1.06(1.01,1.12) |
| **Race, n (%)** |  |  |  |  |  |
| Black | ref | ref | ref | ref | ref |
| Mexican | -0.44 | 0.54 | -0.83 | 0.42 | 0.64(0.20,2.03) |
| other | 0.16 | 0.36 | 0.44 | 0.67 | 1.17(0.54,2.54) |
| White | -0.21 | 0.36 | -0.6 | 0.56 | 0.81(0.37,1.74) |
| **Marital status, n (%)** |  |  |  |  |  |
| Married/Living with partner | ref | ref | ref | ref | ref |
| Never married | 1.22 | 0.45 | 2.71 | 0.02 | 3.40(1.30,8.93) |
| Widowed/Divorced/Separated | 0.65 | 0.54 | 1.2 | 0.25 | 1.91(0.61,6.03) |
| **Education level, n (%)** |  |  |  |  |  |
| College graduate or above | ref | ref | ref | ref | ref |
| Less or equal to High school | 1.87 | 0.83 | 2.27 | 0.04 | 6.50(1.12,37.77) |
| Some college or AA degree | 1.12 | 0.62 | 1.8 | 0.09 | 3.08(0.82,11.60) |
| **Family income, n (%)** |  |  |  |  |  |
| ≤$20.000 | ref | ref | ref | ref | ref |
| $20.000-$35.000 | -0.04 | 0.36 | -0.12 | 0.90 | 0.96(0.44,2.06) |
| $35.000-$75.000 | -1.16 | 0.46 | -2.49 | 0.03 | 0.31(0.12,0.85) |
| ≥$75.000 | -1.67 | 0.45 | -3.68 | 0.002 | 0.19(0.07,0.50) |
| **Alcohol user, n (%)** |  |  |  |  |  |
| current | ref | ref | ref | ref | ref |
| former | 0.85 | 0.55 | 1.53 | 0.15 | 2.33(0.72,7.56) |
| never | -0.36 | 0.58 | -0.62 | 0.54 | 0.70(0.20,2.42) |
| **Smoke, n (%)** |  |  |  |  |  |
| current | ref | ref | ref | ref | ref |
| former | -0.83 | 0.54 | -1.55 | 0.14 | 0.43(0.14,1.37) |
| never | -1.55 | 0.45 | -3.41 | 0.004 | 0.21(0.08,0.56) |
| **Hypertension, n (%)** |  |  |  |  |  |
| no | ref | ref | ref | ref | ref |
| yes | 0.5 | 0.37 | 1.37 | 0.19 | 1.65(0.76,3.59) |
| **Hyperlipidemia, n (%)** |  |  |  |  |  |
| no | ref | ref | ref | ref | ref |
| yes | 1.76 | 0.43 | 4.05 | <0.001 | 5.80(2.31,14.55) |
| **MetS_ATP, n (%)** |  |  |  |  |  |
| no | ref | ref | ref | ref | ref |
| yes | 1.33 | 0.6 | 2.21 | 0.04 | 3.77(1.05,13.47) |
| **MQI. total** | -1.22 | 0.34 | -3.55 | 0.003 | 0.29(0.14,0.61) |
